# Supplementary material for: Effect on ceramic grade CaF2 recovery quality from the etching wastewater under the optimum sulfate content
Source: Royal Society of Chemistry journal article supplement (doi:10.1039/c6ra15540e), 2016-01-01
Supplement: c6ra15540e1.pdf [file c6ra15540e1.pdf]

**Supplementary Information:**

**Effect on ceramic grade CaF<sub>2</sub> recovery quality from the etching  
wastewater under the optimum sulfate content**

Changkai Yin

Ziyang Lou

Haiping Yuan

Nanwen Zhu\*

School of Environmental Science and Engineering, Shanghai Jiao Tong University,  
Shanghai 200240, PR China

Corresponding author: Nanwen Zhu

E-mail: [nwzhu@sjtu.edu.cn](mailto:nwzhu@sjtu.edu.cn)

Tel: +8613916013822

## 1. Figures

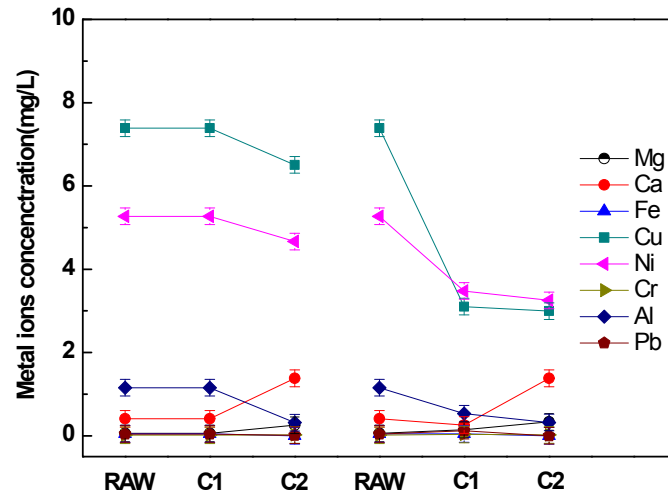

Fig.S1 Concentrations of metal ions adsorbed by 2 g/L AC ( $C_F=1613\text{mg/L}$ ).

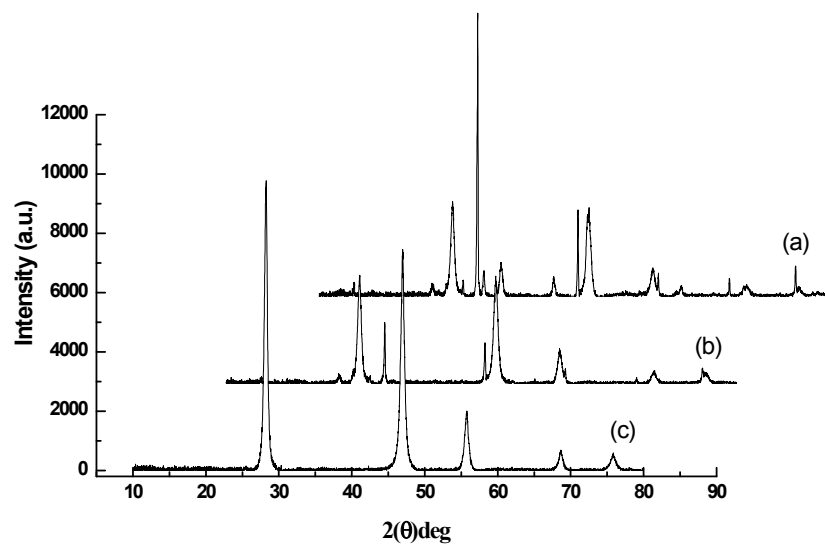

Fig.S2.XRD pattern: (a) calcium fluoride synthesized directly without pre-treatment; (b) calcium fluoride generated by calcium chloride after removal of metal ions by AC absorption ( $\text{Ca}/\text{F}=1.2$ ,  $\text{pH}=7$ ); (c) Ceramic grade  $\text{CaF}_2$ .

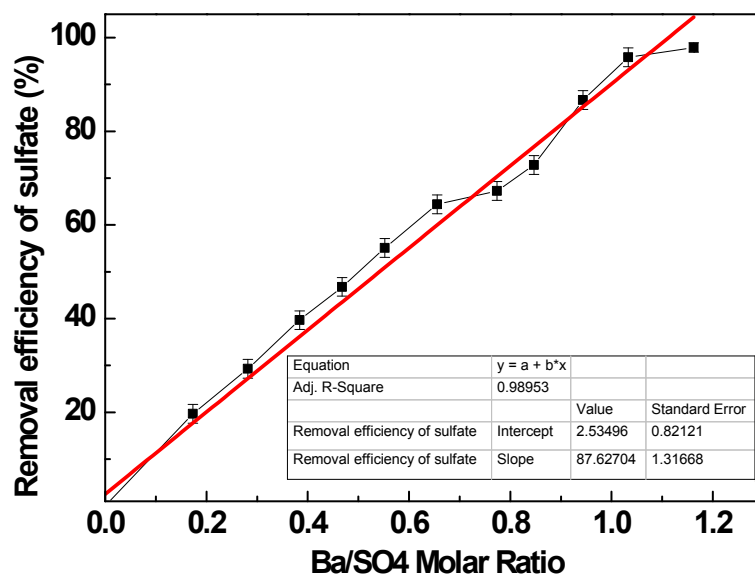

**Fig.S3.** Variations of removal efficiency of sulfate with  $Ba^{2+}/SO_4^{2-}$  molar ratio after 30 min of mixing time.

## 2. Tables

**Table S1** Chemical components of CaF<sub>2</sub> synthesized by CaCl<sub>2</sub> after AC adsorption

| Components                                      | Weight (%) |            |
|-------------------------------------------------|------------|------------|
|                                                 | Control    | Experiment |
| CaF <sub>2</sub>                                | 77.5       | 79.7       |
| CaSO <sub>4</sub>                               | 9.5        | 9.9        |
| Ca <sub>3</sub> (PO <sub>4</sub> ) <sub>2</sub> | 0.6        | 0.7        |
| Other impurity                                  | 12.4       | 9.7        |

**Table S2** Settlement capability analysis of CaF<sub>2</sub> synthesized after AC adsorption.

| Runs       | Turbidity(NTU) |      | Zeta potential(mv) | TOC(mg/L) |
|------------|----------------|------|--------------------|-----------|
|            | 0h             | 1h   |                    |           |
| Control    | 238            | 17.8 | 24.54              | 35.2      |
| Experiment | 267            | 54.8 | 28.81              | 21.4      |

**Table S3** Experimental conditions and chemical composites of CaF<sub>2</sub> production.

| Run          | C <sub>F</sub><br>mg/L | [Ca]/[F] | pH  | C <sub>sulfate</sub><br>mg/L | CaF <sub>2</sub><br>% | CaSO <sub>4</sub><br>% |
|--------------|------------------------|----------|-----|------------------------------|-----------------------|------------------------|
| Control      | 1181                   | 1.2      | 6.9 | 398                          | 78.6                  | 12.4                   |
| Experiment   | 1181                   | 1.2      | 7.1 | 36                           | 92.4                  | 0.6                    |
| Verification | 1408                   | 1.28     | 8.2 | 121                          | 88.2                  | 4.6                    |
